# Supplementary material
Source: PubMed Central journal article supplement (PMC5007145)
Supplement: NIHMS769096-supplement-Supplemental_Digital_Content_1.pdf [file NIHMS769096-supplement-Supplemental_Digital_Content_1.pdf]

## Supplemental Digital Appendix 1

### Search Strategy for Literature Review to Identify Predictors of Primary Care Practice in Underserved Urban or Rural Areas

---

#### DATABASE SEARCHED

PubMed - 11/05/2015

**LANGUAGE:** English

#### SEARCH STRATEGY:

("Physicians, Primary Care"[Mesh] OR "primary care"[text word] OR "family practice" [text word] OR "pediatrics" [text word] OR "general internal medicine" [text word] OR "physician shortage"[text word]) AND ("Medically Underserved Area"[Mesh] OR underserve\*[text word] OR "Rural Health Services"[Mesh] OR "Rural Population"[Mesh] OR "Hospitals, Rural"[Mesh] OR "rural"[text word] OR "small towns" [text word] OR "Rural Health"[Mesh] OR "Professional Practice Location"[Mesh] OR "practice location"[text word] OR "HPSA" [text word] OR "shortage area"[text word]) AND ("manpower" [Subheading] OR "supply and distribution" [Subheading] OR recruit\* OR supply[text word] OR manpower[text word] OR incentive\* OR attract\* OR "income" OR "monetary" [text word] OR economic\* OR "financial" OR opportunit\* OR influen\* OR "loans" [text word])

**NUMBER OF RESULTS:** 3663

---

#### DATABASE SEARCHED

ERIC

**LANGUAGE:** English

#### SEARCH STRATEGY:

((DE "Primary Health Care" OR TX ("primary care" OR "physician shortage" OR "family physician" OR "pediatrics" OR "general internal medicine")) AND ((DE "Rural Population" OR DE "Rural Areas" OR DE "Geographic Location") OR (underserve\* OR rural OR "practice location" OR HPSA OR "shortage area" OR "Medically Underserved Area" OR "practice location")) AND ((DE "Labor Force" OR DE "Supply and Demand" OR DE "Recruitment") OR recruit\* OR supply)

**NUMBER OF RESULTS:** 60

---

**DATABASE SEARCHED**

Scopus

**LANGUAGE:** English

**SEARCH STRATEGY:**

( INDEXTERMS ( physicians OR "personnel shortage" OR "primary medical care") OR  
TITLE-ABS-KEY ( "physician shortage" OR "primary care" )) AND ( INDEXTERMS (  
"Medically Underserved Area" OR "Professional Practice Location" OR "Rural Health  
Services" OR "rural area" OR "rural health care" ) OR TITLE-ABS-KEY ( rural OR  
"practice location" OR "shortage area" OR hpsa ) ) AND ( INDEXTERMS ( manpower ) OR  
TITLE-ABS-KEY ( recruit\* OR supply OR manpower ) ) AND NOT INDEX ( medline )

**NUMBER OF RESULTS:** 407 documents \*\*

\*\* excluding items that are indexed in Medline

---
