# Supplementary material
Source: PubMed Central journal article supplement (PMC5007145)
Supplement: NIHMS769096-supplement-Supplemental_Digital_Content_2.pdf [file NIHMS769096-supplement-Supplemental_Digital_Content_2.pdf]

## Supplemental Digital Appendix 2

### Summaries of 72 Included Studies Categorized by Theme According to Primary Focus

#### A. Studies That Examined Personal Characteristics, Attributes, or Background as Predictors of Primary Care Physician Practice in an Underserved Urban or Rural Area (n = 19)

| Study author, year <sup>ref</sup>  | Design; sample size                       | Participants and data source                                                                                              | Predictor(s)                        | Outcome(s)                                                                         | Results <sup>a</sup>                                    |
|------------------------------------|-------------------------------------------|---------------------------------------------------------------------------------------------------------------------------|-------------------------------------|------------------------------------------------------------------------------------|---------------------------------------------------------|
| Komaromy et al, 1996 <sup>12</sup> | Cross-sectional; 718 physicians           | Survey of physician with AMA Physician Masterfile practice zip code linked to U.S. Census data for California communities | Black physicians vs others          | Urban community                                                                    | $\beta$ coef. $-0.89$ ( $-1.4$ – $-0.4$ ), $P < .001$   |
|                                    |                                           |                                                                                                                           | Hispanic physicians vs non-Hispanic |                                                                                    | $\beta$ coef. $-0.9$ ( $-1.2$ – $-0.56$ ), $P < .001$   |
|                                    |                                           |                                                                                                                           | Black physicians vs others          | Rural community                                                                    | $\beta$ coef. $-1.35$ ( $-2.7$ – $-0.05$ ), $P < .001$  |
|                                    |                                           |                                                                                                                           | Hispanic physicians vs non-Hispanic |                                                                                    | $\beta$ coef. $-0.57$ ( $-0.9$ – $-0.23$ ), $P < .001$  |
|                                    |                                           |                                                                                                                           | Black physicians vs others          | % black patients                                                                   | $\beta$ coef. $42.9$ (38-47), $P < .001$                |
|                                    |                                           |                                                                                                                           | Foreign medical school graduates    |                                                                                    | $\beta$ coef. $1.6$ ( $-0.9$ - $4.2$ ), NS              |
|                                    |                                           |                                                                                                                           | Hispanic physicians vs non-Hispanic | % Hispanic patients                                                                | $\beta$ coef. $30.2$ (25-36), $P < .001$                |
| Foreign medical school graduates   | $\beta$ coef. $10.9$ (7.4-14), $P < .001$ |                                                                                                                           |                                     |                                                                                    |                                                         |
| Cregler et al, 1997 <sup>31</sup>  | Case series; 414 physicians               | CUNY graduates who completed MD degree, practice address available for 79% (327/414), and 160 practiced in New York       | Graduates with practice data        | Practice in underserved area*                                                      | 33% (no comparison group)                               |
|                                    |                                           |                                                                                                                           | White                               |                                                                                    | 26%                                                     |
|                                    |                                           |                                                                                                                           | African American                    |                                                                                    | 73%                                                     |
|                                    |                                           |                                                                                                                           | Latino                              |                                                                                    | 50%                                                     |
| Baer et al, 1998 <sup>32</sup>     | Cross-sectional; Sample size not reported | Primary care physicians (allopathic and osteopathic) from AMA Physician Masterfile linked to Area Resource File           | IMG and USMG                        | Practice in rural HPSA (ratio of primary care IMGs to all primary care physicians) | 18.7% in nonmetropolitan whole county HPSAs were IMGs   |
|                                    |                                           |                                                                                                                           |                                     |                                                                                    | 15.2% in nonmetropolitan partial county HPSAs were IMGs |
|                                    |                                           |                                                                                                                           |                                     |                                                                                    | 14.3% in non-HPSA's were IMGs                           |

Supplemental digital content for Goodfellow A, Ulloa JG, Dowling PT, et al. Predictors of Primary Care Physician Practice Location in Underserved Urban and Rural Areas in the United States: A Systematic Literature Review. Acad Med.

| Study author, year <sup>ref</sup> | Design; sample size                       | Participants and data source                                                                          | Predictor(s)                                                                                                                                                 | Outcome(s)                                                                                  | Results <sup>a</sup>                                                                                                                                                                                                                                                                     |
|-----------------------------------|-------------------------------------------|-------------------------------------------------------------------------------------------------------|--------------------------------------------------------------------------------------------------------------------------------------------------------------|---------------------------------------------------------------------------------------------|------------------------------------------------------------------------------------------------------------------------------------------------------------------------------------------------------------------------------------------------------------------------------------------|
| Mick and Lee, 1999 <sup>34</sup>  | Cross-sectional; 69,065 physicians        | Primary care physicians (allopathic and osteopathic) using AMA Masterfile and Area Resource File      | IMG and USMG                                                                                                                                                 | Practice in county with low socioeconomic status (SES) composite variable                   | Primary care IMGs nationally were significantly more likely than primary care USMGs to be located in low SES counties, with a difference in proportion of -6.9 percent                                                                                                                   |
|                                   |                                           |                                                                                                       | Proportion of physicians in each state's rural counties characterized by need                                                                                | Practice area with high proportion of nonwhite population                                   | 12 states had significant primary care IMG disproportions                                                                                                                                                                                                                                |
|                                   |                                           |                                                                                                       |                                                                                                                                                              | Low physician-to-population ratio (112/100,00)                                              | Significant primary care IMG disproportion of -4.1 percent, and -12.4 percent for specialty care                                                                                                                                                                                         |
| Mick and Lee, 1999 <sup>33</sup>  | Cross-sectional; 77 cities in the US      | Practicing physicians using AMA Masterfile, linked to US Census zip-code level data                   | IMG and USMG                                                                                                                                                 | Practice in high poverty area (Proportion of physicians in high-poverty areas in US cities) | Large cities: 7 cities had IMG complements significantly exceeding the average 29.6% IMGs in high-poverty areas<br>Mid-size cities: 10 cities significantly exceeded the average 21.6% IMGs in high-poverty areas<br>Small cities: 6 cities significantly exceeded the 16.7% IMG average |
| Mick et al, 2000 <sup>35</sup>    | Cross-sectional; sample size not reported | Allopathic and osteopathic physicians from 1997 AMA Physician Masterfile linked to Area Resource File | IMGs and USMGs                                                                                                                                               | Socioeconomic status (SES)                                                                  | IMGs nationally more likely than USMGs to practice in counties with low SES (-1.2%, $P < .05$ )                                                                                                                                                                                          |
|                                   |                                           |                                                                                                       | (Proportion of IMGs distributed in needy state counties divided by total number of IMGs in all state counties subtracted from analogous proportion of USMGs) | Nonwhite % of population                                                                    | IMGs nationally more likely than USMGs to practice in counties with high proportion nonwhite population (-3.8%, $P < .05$ )                                                                                                                                                              |
|                                   |                                           |                                                                                                       | (Negative value = IMG disproportion, and positive value = USMG disproportion)                                                                                | Rural vs urban location                                                                     | USMGs nationally more likely than IMGs to practice rural versus urban counties (1.4%, $P < .05$ )                                                                                                                                                                                        |

| Study author, year <sup>ref</sup>    | Design; sample size                           | Participants and data source                                                                                                                                                             | Predictor(s)                                                    | Outcome(s)                                                                                                                                                                           | Results <sup>a</sup>                                    |
|--------------------------------------|-----------------------------------------------|------------------------------------------------------------------------------------------------------------------------------------------------------------------------------------------|-----------------------------------------------------------------|--------------------------------------------------------------------------------------------------------------------------------------------------------------------------------------|---------------------------------------------------------|
| Rabinowitz et al, 2000 <sup>36</sup> | Cross sectional; 2,199 physicians             | Allopathic and osteopathic generalist physicians (family practice, general practice, general internal medicine, or general pediatrics), U.S. graduates, random sample, 74% response rate | Member of an underserved/minority group                         | Practice in underserved area (practice in a federally designated area [HPSA or MUA], practice with 40% or more of medically indigent patients, or 40% or more patients who are poor) | AOR 2.9 (1.9-4.4), $P < .001$                           |
|                                      |                                               |                                                                                                                                                                                          | Growing up in an inner city or rural area                       |                                                                                                                                                                                      | AOR 1.6 (1.3-2.0), $P < .001$                           |
|                                      |                                               |                                                                                                                                                                                          | Service in the NHSC                                             |                                                                                                                                                                                      | AOR 2.2 (1.6-3.0), $P < .001$                           |
|                                      |                                               |                                                                                                                                                                                          | Strong interest in underserved practice prior to medical school |                                                                                                                                                                                      | AOR 1.7 (1.4-2.1), $P < .001$                           |
|                                      |                                               |                                                                                                                                                                                          | Family income when growing up                                   |                                                                                                                                                                                      | AOR 1.0 (0.9-1.2), $P = .58$                            |
| Polsky et al, 2002 <sup>37</sup>     | Retrospective cohort study; 19,940 physicians | IMGs who completed GME in the United States between 1989–1994 and who were in patient care practice 4.5 years later, used AMA Physician Masterfile                                       | Foreign born IMGs from Asian countries                          | Practice in market areas where ethnic composition of the population matched their own ethnicity                                                                                      | RR 1.36, $P < .05$                                      |
|                                      |                                               |                                                                                                                                                                                          | Foreign born IMGs from Hispanic countries                       |                                                                                                                                                                                      | RR 1.39, $P < .05$                                      |
|                                      |                                               |                                                                                                                                                                                          | All foreign born IMGs                                           |                                                                                                                                                                                      | RR 2.013, $P < .05$                                     |
| Fink et al, 2003 <sup>38</sup>       | Cross-sectional; 524,404 physicians           | U.S. primary care physicians, used AMA Physician Masterfile linked to Area Resource File                                                                                                 | USMG vs. IMG                                                    | Practice in rural underserved HPSA                                                                                                                                                   | 2.1% vs 2.1% (percent of total primary care)            |
|                                      |                                               |                                                                                                                                                                                          | US-IMG vs foreign born (FB)-IMG                                 |                                                                                                                                                                                      | 1.5% vs 2.1%                                            |
|                                      |                                               |                                                                                                                                                                                          | Family practice USMG vs. IMG                                    |                                                                                                                                                                                      | 1.3% vs 0.4%                                            |
|                                      |                                               |                                                                                                                                                                                          | Family practice US-IMG vs. FB-IMG                               |                                                                                                                                                                                      | 0.8% vs 0.4%                                            |
|                                      |                                               |                                                                                                                                                                                          | Internal medicine USMG vs. IMG                                  |                                                                                                                                                                                      | 0.3% vs 1.0%                                            |
| Internal medicine US-IMG vs. FB-IMG  | 0.4% vs 1.0%                                  |                                                                                                                                                                                          |                                                                 |                                                                                                                                                                                      |                                                         |
| Bach et al, 2004 <sup>16</sup>       | Cross-sectional; 4,355 physicians             | 150,391 visits by black and white Medicare beneficiaries 65 years of age or older                                                                                                        | Physicians providing care to white patients vs. black patients  | Income in areas of practice                                                                                                                                                          | Lower incomes in areas with black visits ( $P < .001$ ) |

| Study author, year <sup>ref</sup>  | Design; sample size                 | Participants and data source                                                                                                  | Predictor(s)                                                                             | Outcome(s)                                                | Results <sup>a</sup>                                                                                                                                     |
|------------------------------------|-------------------------------------|-------------------------------------------------------------------------------------------------------------------------------|------------------------------------------------------------------------------------------|-----------------------------------------------------------|----------------------------------------------------------------------------------------------------------------------------------------------------------|
| Yoon et al, 2004 <sup>14</sup>     | Cross-sectional; 1,364 physicians   | Survey of primary care and specialist physicians practicing in California, 61% response rate                                  | Spanish-speaking primary care physicians vs non-Spanish-speaking primary care physicians | Percent of residents in area who are LEP Spanish-speaking | 15.3% vs 9.7%, $P < .05$                                                                                                                                 |
|                                    |                                     |                                                                                                                               | Spanish-speaking specialist physicians vs non-Spanish-speaking specialist physicians     | Percent of residents in area who are LEP Spanish-speaking | 12.9% vs 9.2%, $P < .05$                                                                                                                                 |
| Hughes et al, 2005 <sup>39</sup>   | Cross-sectional; 214 physicians     | Cohort study of graduates of the University of California, San Francisco – Fresno Family Practice Residency Program 1970–2000 | High school census track used to determine graduation from:<br>1) rural high school      | Practice in rural area                                    | 32% vs 11% ( $P < .05$ )<br>AOR 5.7 (2.0-16.4), ( $P < .05$ )                                                                                            |
|                                    |                                     |                                                                                                                               | 2) high minority setting high school                                                     | Practice in area with high minority persons               | 31% vs 16% ( $P < .05$ )<br>AOR 6.5 (1.1-37.6), ( $P < .05$ )                                                                                            |
|                                    |                                     |                                                                                                                               | 3) high school in MUA                                                                    | Practice in MUA                                           | 13% vs 18% ( $P > .05$ )<br>AOR 0.7 (0.2-2.0), $P > .05$                                                                                                 |
|                                    |                                     |                                                                                                                               | Graduate in rural training track                                                         | Practice in rural area                                    | AOR 2.7 (1.2-6.4), ( $P < .05$ )                                                                                                                         |
| Wade et al, 2007 <sup>41</sup>     | Cross-sectional; 2,487 physicians   | Family medicine graduates of Indiana University School of Medicine (1988–1997)                                                | Non-metro hometown                                                                       | Practice in rural area                                    | AOR 4.7 (3.27-6.69), $P < .001$ for all specialties<br>AOR 4.4 (2.51-7.82), $P < .01$ for family physicians                                              |
| Mertz et al, 2007 <sup>40</sup>    | Cross-sectional; 3,862 physicians   | Survey of primary care and specialist physicians practicing in California, no longer in training                              | South Asian IMG vs South Asian US-IMG                                                    | Practice in HPSA                                          | AOR 1.6, $P < .05$                                                                                                                                       |
|                                    |                                     |                                                                                                                               |                                                                                          | Practice in MUA                                           | AOR 1.1, $P < .05$                                                                                                                                       |
|                                    |                                     |                                                                                                                               |                                                                                          | Practice in rural area                                    | AOR 1.6, $P < .05$                                                                                                                                       |
| Thompson et al, 2009 <sup>42</sup> | Cross-sectional; 205,063 physicians | AMA Physician Masterfile for allopathic and osteopathic primary care physicians linked to Rural-Urban Commuting Areas         | IMG vs USMG                                                                              | Rural and urban location using reported ZIP code          | IMGs were significantly more likely than USMGs to practice in rural areas in 2 out of the 9 Census Divisions (East South Central and West North Central) |

| Study author, year <sup>ref</sup>    | Design; sample size                                           | Participants and data source                                                                                                                                                    | Predictor(s)                                                                                                            | Outcome(s)                                                  | Results <sup>a</sup>                                          |
|--------------------------------------|---------------------------------------------------------------|---------------------------------------------------------------------------------------------------------------------------------------------------------------------------------|-------------------------------------------------------------------------------------------------------------------------|-------------------------------------------------------------|---------------------------------------------------------------|
| Moreno et al, 2011 <sup>13</sup>     | Cross-sectional; 61,138 physicians                            | Survey of primary care and specialist physicians practicing in California, no longer in training, 83% response rate                                                             | Physician fluency in an Asian language                                                                                  | Practice in areas with high numbers of LEP Asian speakers   | AOR 1.77 (1.63-1.92), $P < .001$                              |
|                                      |                                                               |                                                                                                                                                                                 | Physician fluency in Spanish                                                                                            | Practice in areas with high numbers of LEP Spanish speakers | AOR 1.77 (1.43- 1.82), $P < .001$                             |
| Odom et al, 2012 <sup>43</sup>       | Cross-sectional; 48,388 physicians                            | Survey of primary care and specialist physicians practicing in California, no longer in training                                                                                | African American, Latino, Asian, Pacific Islander and “other” racial and ethnic minority physicians vs white physicians | Practice in MUA                                             | Range for AOR 1.22-2.25, $P < .05$                            |
|                                      |                                                               |                                                                                                                                                                                 | African American, Latino, and “other” racial and ethnic minority physicians vs white physicians                         | Practice in HPSA                                            | Range for AOR 1.40-1.97, $P < .05$                            |
| Rabinowitz et al, 2012 <sup>44</sup> | Retrospective cohort study with control group; 762 physicians | Graduates of Jefferson Medical College from the classes of 1978-1982 self-reporting growing up rural, planning rural practice, and planning family medicine at matriculation    | Having all three predictors of rural practice at matriculation vs having no predictors (695 with complete data)         | Rural practice Location                                     | 45% (35%-55%) vs 12% (8%-15%)<br>RR 3.9 (2.7-5.7), $P < .001$ |
| Duffrin et al, 2014 <sup>45</sup>    | Cross-sectional; 2,829 physicians                             | Survey of practicing primary care physicians in North Carolina (family medicine, general practice, pediatrics, obstetrics/gynecology, and internal medicine), 34% response rate | Raised in hometown population of $\leq 11,000$ vs. hometown population of $> 11,000$                                    | Practice in rural area vs metro area                        | 72% vs. 38.6%, $P = .007$                                     |

Abbreviations: HPSA indicates federally designated primary care Health Professional Shortage Area; MUA, Medically Underserved Area; NS, not significant; IMG, international medical graduate; USMG, U.S. medical graduate; GME, graduate medical education; AMA, American Medical Association; CUNY, City University of New York; LEP, low or limited English proficiency; NHSC, National Health Service Corp; AOR, adjusted odds ratio; RR, risk ratio.

<sup>a</sup>95% confidence intervals are provided in parentheses.

## B. Studies That Examined Financial Factors as Predictors of Primary Care Physician Practice in Underserved Urban or Rural Areas (n = 13)

| Study authors, year <sup>ref</sup> | Design; sample size                                                           | Participants and data source                                                                                                                              | Predictor(s)                                                                                           | Outcome(s)                                               | Results <sup>a</sup>                                                                                                      |
|------------------------------------|-------------------------------------------------------------------------------|-----------------------------------------------------------------------------------------------------------------------------------------------------------|--------------------------------------------------------------------------------------------------------|----------------------------------------------------------|---------------------------------------------------------------------------------------------------------------------------|
| Pathman et al, 1994 <sup>46</sup>  | Retrospective cohort study with control group; 1,675 physicians               | Primary care rural physicians, 675 in NHSC program and 1,000 non-NHSC physicians                                                                          | NHSC physician participants vs. non-NHSC physicians                                                    | Practice in rural area and saw more minority patients    | 61.7% vs. 28.2%, $P < .001$                                                                                               |
| Cullen et al, 1997 <sup>47</sup>   | Cross-sectional; 2,903 physicians                                             | NHSC scholarship recipients graduating from U.S. medical schools between 1975–1983 who were originally stationed in nonmetropolitan areas                 | Original NHSC assignment to rural location                                                             | Rural practice location in county of original assignment | 20% of NHSC participants (no comparison group)                                                                            |
|                                    |                                                                               |                                                                                                                                                           |                                                                                                        | Other rural practice                                     | 20% of NHSC participants                                                                                                  |
| Xu et al, 1997 <sup>15</sup>       | Cross sectional; 1,911 physicians                                             | Random sample survey of physicians (family practice, general internal medicine, or general pediatrics), 74% response rate                                 | NHSC completion                                                                                        | Care for medically underserved patient populations       | $\beta$ coef. 7.46, $P = .0001$                                                                                           |
| Pathman et al, 2000 <sup>20</sup>  | Cross-sectional; 375 physicians                                               | Survey of practicing family physicians, general internists, and pediatricians who graduated from U.S. medical schools in 1988 and 1992. 70% response rate | Obligated (participation in a support-for-service program) vs non-obligated (not serving a commitment) | Rural practice                                           | 33.3% vs 6.5%, $P < .001$<br>Adjusted odds ratio (AOR) 3.45, $P < .001$                                                   |
|                                    |                                                                               |                                                                                                                                                           |                                                                                                        | Average percentage of uninsured and Medicaid patients    | 53.1% vs 29.4%, $P < .001$<br>$\beta$ -coef (adjusted) 0.273 for non-obligated, $P < .001$                                |
| Fryer et al, <sup>48</sup> 2002    | Retrospective cohort study with control group; 177,558 physicians in practice | Graduates of US medical schools from 1981–1993 engaged in direct patient care in 2000                                                                     | Exposure to Title VII funding in medical school and residency vs no exposure                           | Primary care HPSA                                        | 1.5% vs 1.1%                                                                                                              |
|                                    |                                                                               |                                                                                                                                                           |                                                                                                        | Rural practice                                           | 12.7% vs 9.5%                                                                                                             |
| Holmes, G, 2004 <sup>49</sup>      | Cross-sectional; 60,000 physicians                                            | USMGs from 1997 AMA Physician Masterfile; 3 cohorts, restricted to primary care with traceable zip code                                                   | NHSC completion vs. other                                                                              | Practice in any underserved area                         | Cohort 1: Probit coef 0.528<br>Cohort 2: Probit coef 0.697<br>Cohort 3: probit coef 0.812<br>( $P < .01$ for all cohorts) |

| Study authors, year <sup>ref</sup> | Design; sample size                                     | Participants and data source                                                                                                                                                                      | Predictor(s)                                                                 | Outcome(s)                               | Results <sup>a</sup>                                                                                                    |
|------------------------------------|---------------------------------------------------------|---------------------------------------------------------------------------------------------------------------------------------------------------------------------------------------------------|------------------------------------------------------------------------------|------------------------------------------|-------------------------------------------------------------------------------------------------------------------------|
| Probst et al, 2003 <sup>50</sup>   | Cross-sectional<br>3,608 physicians,<br>15,201 patients | 1998 active practicing South Carolina physicians, excluding trainees (NHSC alumni, N = 135)                                                                                                       | NHSC completion vs. other South Carolina physicians                          | County poverty quartile                  | 13.3% vs 3.7% (for highest quartile)                                                                                    |
|                                    |                                                         |                                                                                                                                                                                                   |                                                                              | County black population quartile         | 11.8% vs 3.5% (for highest quartile)                                                                                    |
|                                    |                                                         |                                                                                                                                                                                                   |                                                                              | Practice in HPSA                         | 12.6% vs 5.1%                                                                                                           |
|                                    |                                                         |                                                                                                                                                                                                   |                                                                              | Practice in FQHC                         | 1.9% vs 0.5%                                                                                                            |
| Brooks et al, 2003 <sup>51</sup>   | Cross-sectional 1,635 physicians                        | Survey of U.S. primary care physicians in Florida. 339 rural and 1,236 non-rural physicians, 61% response rate                                                                                    | NHSC completion vs. other                                                    | Rural practice                           | AOR 5.46 (4.20 to 7.10), $P < .01$                                                                                      |
|                                    |                                                         |                                                                                                                                                                                                   | Rural upbringing                                                             |                                          | Rural physicians were more likely to be raised in rural areas than suburban/urban colleagues (26% vs 13.4%; $P = .01$ ) |
|                                    |                                                         |                                                                                                                                                                                                   | Foreign-born                                                                 |                                          | Foreign born AOR 1.85 (1.58 to 2.15), $P < .05$                                                                         |
| Pathman et al, 2004 <sup>52</sup>  | Cross sectional 434 physicians                          | 69 state support-for-service physician programs operating in 1996; programs provided financial support in exchange for service in underserved area. Matched group of 723 non-obligated physicians | Obligated vs non-obligated                                                   | Retention in service practice            | Hazard ratio (HR) for leaving 0.75 (0.53-1.03), $P = .08$                                                               |
|                                    |                                                         |                                                                                                                                                                                                   | Loan repayment vs other programs                                             | Care for uninsured and Medicaid patients | 48.5% vs. 28.5%, $P < .001$                                                                                             |
|                                    |                                                         |                                                                                                                                                                                                   |                                                                              | Retention in service practice            | HR 0.46 [0.30-0.70], $P < .001$                                                                                         |
| Krist et al, 2005 <sup>18</sup>    | Cross sectional 9,107 physicians                        | Family physicians                                                                                                                                                                                 | Exposure to Title VII funding in medical school and residency vs no exposure | Practice in low income communities       | 11.9% vs 9.9%, $P \leq .02$                                                                                             |
|                                    |                                                         |                                                                                                                                                                                                   |                                                                              | Practice in rural areas                  | 24.5% vs 21.8%, $P < .02$                                                                                               |
| Lipkin et al, 2008 <sup>53</sup>   | Cross-sectional; 122 physicians                         | Graduates of Title VII funded New York Primary Care Internal Medicine Residency Program                                                                                                           | Completion of program                                                        | Practice with underserved                | 90% work with the underserved (no comparison group)                                                                     |

| Study authors, year <sup>ref</sup>    | Design; sample size                 | Participants and data source                                                                                                                              | Predictor(s)                                                                                 | Outcome(s)                      | Results <sup>a</sup>                                                                                                                                                                                 |
|---------------------------------------|-------------------------------------|-----------------------------------------------------------------------------------------------------------------------------------------------------------|----------------------------------------------------------------------------------------------|---------------------------------|------------------------------------------------------------------------------------------------------------------------------------------------------------------------------------------------------|
| Rittenhouse et al, 2008 <sup>54</sup> | Cross-sectional; 412,012 physicians | Physicians in 2004 AMA Physician Masterfile merged with record of institution Title VII grant receipt, Medicare claims data and NHSC participant database | Primary care physician attendance of Title VII funded training program with academic grant   | Work in community health center | AOR 1.12 (10.4-1.20), <i>P</i> < .01 for primary care physicians                                                                                                                                     |
|                                       |                                     |                                                                                                                                                           | Primary care attendance of Title VII funded training program with residency grant            |                                 | AOR 1.23 (1.16-1.31), <i>P</i> < .001 for primary care physicians                                                                                                                                    |
|                                       |                                     |                                                                                                                                                           | NHSC completion                                                                              |                                 | AOR 1.41 (1.30-1.52), <i>P</i> < .001 for family physicians                                                                                                                                          |
|                                       |                                     |                                                                                                                                                           |                                                                                              |                                 | AOR 6.16 (5.68-6.69). <i>P</i> < .01 for primary care physicians                                                                                                                                     |
| Chou and Lo Sasso, 2009 <sup>19</sup> | Cross-sectional; 3,758 physicians   | Exiting residents in OB/GYN, surgery, general internal medicine, pediatrics, or family medicine in New York                                               | Primary care physician with educational debt > \$0 but < \$100,000, vs with debt > \$100,000 | Practice in HPSA                | RR 0.104 vs .017, <i>P</i> < .01 for primary care physicians<br>Primary care physicians with no debt are 3 times more likely to locate in a HPSA<br>Results non-significant for surgeons and OB/GYNs |

Abbreviations: NHSC indicates National Health Services Corps; HPSA, federally designated primary care Health Professional Shortage Area; USMG, United States Medical Graduate; AMA, American Medical Association; OB/GYN, obstetrics/gynecology; AOR, adjusted odds ratio; HR, Hazard ratio; RR, risk ratio; FQHC, federally qualified health center.

<sup>a</sup>95% confidence intervals are provided in parentheses.



### C. Studies That Examined Medical School Curricula and Programs as Predictors of Primary Care Physician Practice in Underserved Urban Areas (n = 8)

| Study authors, year <sup>ref</sup>       | Design; sample size                        | Participants and data source                                                                                                  | Predictor(s)                                                                   | Outcome(s)                                                                                                | Results <sup>a</sup>                                                                                             |
|------------------------------------------|--------------------------------------------|-------------------------------------------------------------------------------------------------------------------------------|--------------------------------------------------------------------------------|-----------------------------------------------------------------------------------------------------------|------------------------------------------------------------------------------------------------------------------|
| Johnson et al, 1989 <sup>55</sup>        | Case series; 1,985 physicians              | Survey of Howard University College of Medicine (HUCM) graduates spanning 49 classes, 728 respondents, 37% response rate      | Graduate of HUCM                                                               | Practice in large urban area<br>Practice in the inner city                                                | 60% [no comparison group]<br>30%                                                                                 |
| Campos-Outcalt et al, 1997 <sup>56</sup> | Cross sectional; 282 physicians            | Survey of all Commitment to Underserved People (CUP) participants and random sample of non-participating classmates 1983-1987 | Completion of the CUP program vs randomly selected nonparticipating classmates | Indian Health Service<br>Practicing in rural area (communities < 25,000 persons)                          | AOR 7.42 (1.71-32.16), <i>P</i> = .001<br>32% vs. 10%; <i>P</i> = .004<br>AOR 5.94 (2.04-17.27), <i>P</i> = .001 |
|                                          |                                            |                                                                                                                               | Family practice specialty                                                      |                                                                                                           | AOR 9.65 (3.52-26.55), <i>P</i> < .001                                                                           |
|                                          |                                            |                                                                                                                               | Family practice specialty                                                      | Community health center ever                                                                              | AOR 3.26 (1.32-8.07), <i>P</i> = .01                                                                             |
| Gugelchuk et al, 1999 <sup>57</sup>      | Case series 765 physicians                 | Alumni of Western University (1982-1995), Osteopathic School                                                                  | Graduation from Western University                                             | Underserved practice location                                                                             | 20% [no comparison group]                                                                                        |
| Rabinowitz et al, 1999 <sup>58</sup>     | Retrospective cohort study; 206 physicians | Physicians who participated in the Jefferson Medical College Physician Shortage Area Program (PSAP) from 1978-1991            | Completion of PSAP vs non-PSAP                                                 | Practice in HPSA or Health Manpower Shortage Area (HMPSA)                                                 | 39% vs 9%, RR 3.2                                                                                                |
| Ko et al, 2007 <sup>59</sup>             | Cross-sectional; 1,071 physicians          | Graduates of the UCLA/Drew program and controls from UCLA School of Medicine (1985-1995)                                      | Completion of UCLA/Drew program vs UCLA students                               | Practice in area medically disadvantaged area (HPSA/MUA, rural, high minority area, or high poverty area) | OR 2.47 (1.59-3.83), <i>P</i> < .001                                                                             |

| Study authors, year <sup>ref</sup> | Design; sample size                                           | Participants and data source                                                                                                                                                                                                             | Predictor(s)                              | Outcome(s)                                        | Results <sup>a</sup>              |
|------------------------------------|---------------------------------------------------------------|------------------------------------------------------------------------------------------------------------------------------------------------------------------------------------------------------------------------------------------|-------------------------------------------|---------------------------------------------------|-----------------------------------|
| McDougle et al, 2010 <sup>60</sup> | Retrospective cohort study with control group; 103 physicians | Graduates who completed the Ohio State University College (OSU) of Medicine postbaccalaureate program (PBP) from 1996-2002 and had been in practice for at least 1 year, with random control of non-PBP OSU graduates, 79% response rate | Completion of OSU PBP vs not in OSU PBP   | Practice in HPSA/MUA                              | 29.4% vs 5.1%, $P < .009$         |
|                                    |                                                               |                                                                                                                                                                                                                                          |                                           | Practice in area with poor patients               | 67.6% vs 33.3%, $P < .003$        |
| Lupton et al, 2012 <sup>17</sup>   | Retrospective cohort study with control group; 303 physicians | University of California postbaccalaureate (UCPB) alumni from 1986-2002 and 586 randomly selected control physicians in the AMA Physician Masterfile                                                                                     | Completion of UCPB program vs not in UCPB | Practice in high-poverty area                     | 16.2% vs 8.7%, $P < .016$         |
|                                    |                                                               |                                                                                                                                                                                                                                          |                                           | Practice in high Latino population area           | 18.3% vs 8.7%, $P < .01$          |
|                                    |                                                               |                                                                                                                                                                                                                                          |                                           | Practice in high African American population area | 29.8% vs 19.8%, $P < .02$         |
|                                    |                                                               |                                                                                                                                                                                                                                          |                                           | Practice in HPSA/MUA                              | No difference                     |
| Roy et al, 2015 <sup>61</sup>      | Case series; 42 physicians                                    | Survey of graduates of the Urban Underserved Program (UUP), response rate of 71.4% (n = 30), underserved defined as practicing in community health center; HPSA; FQHC; or > 40% of patients on Medicaid or uninsured or poor             | Graduate of UUP                           | Practice in urban underserved area                | 75% (21/28) (no comparison group) |

Abbreviations: NHSC indicates National Health Service Corps; HPSA, federally designated primary care Health Professional Shortage Area; FQHC, Federally Qualified Health Center; MUA, Medically Underserved Area; AOR, adjusted odds ratio; OR, odds ratio; RR, risk ratio.

<sup>a</sup>95% confidence intervals are provided in parentheses.

#### D. Studies That Examined Medical School Curricula and Programs as Predictors of Primary Care Physician Practice in Rural Areas, Published 2008-2015 (n = 12)

| Study authors, Year <sup>ref</sup>   | Design; sample size                                             | Participants and data source                                                                                                                                                                  | Predictor(s)                                                                     | Outcome(s)                              | Results <sup>a</sup>                                                                                                                                                                                                          |
|--------------------------------------|-----------------------------------------------------------------|-----------------------------------------------------------------------------------------------------------------------------------------------------------------------------------------------|----------------------------------------------------------------------------------|-----------------------------------------|-------------------------------------------------------------------------------------------------------------------------------------------------------------------------------------------------------------------------------|
| Glasser et al, 2008 <sup>62</sup>    | Case series; 103 physicians                                     | Graduates of University of Illinois College Rural Medical Education Program (RMED) program in current practice                                                                                | Completion of RMED                                                               | Rural practice                          | 64.4% (no comparison group)                                                                                                                                                                                                   |
| Halaas et al, 2008 <sup>63</sup>     | Retrospective cohort study ; 901 physicians                     | Graduates of the Minnesota Rural Physician Associate Program (RPAP) in current practice                                                                                                       | Completion of RPAP and primary care specialty                                    | Rural vs metropolitan practice location | 56% vs 44%, $P = ns$ for primary care<br>[no comparison group]<br>61% vs 39%, $P \leq .001$ for family medicine<br>26% vs 76%, $P < .001$ for internal medicine, pediatrics, medicine/pediatrics<br>31% vs 18%, $P \leq .001$ |
| Zink et. al, 2010 <sup>64</sup>      | Retrospective cohort study with control group; 3,365 physicians | 215 graduates of the University of Minnesota-Duluth campus Rural Physician Associate Program (RPAP), 276 RPAP-Twin Cities campus graduates, and 2,874 non-RPAP graduates of both UMN campuses | Completion of RPAP<br>Duluth campus<br>Raised in rural community vs metropolitan | Rural practice                          | AOR 4.62 (3.01-7.09), $P < .001$<br>AOR 4.09 (2.81-5.96), $P < .001$<br>AOR 2.82 (2.10-3.79), $P < .001$                                                                                                                      |
| Rabinowitz et al, 2011 <sup>25</sup> | Retrospective cohort study with control group; 1,551 physicians | Graduates from 3 rural programs from inception until 2005                                                                                                                                     | Completed training in one of three rural programs                                | Rural practice                          | 63% any specialty [range 45% to 76%; no comparison group]<br>71% family medicine<br>55% general internal medicine and pediatrics<br>55% non-primary care specialties                                                          |

| Study authors, Year <sup>ref</sup>    | Design; sample size                                             | Participants and data source                                                                                                                                                            | Predictor(s)                                                | Outcome(s)                                                         | Results <sup>a</sup>                                                                                   |
|---------------------------------------|-----------------------------------------------------------------|-----------------------------------------------------------------------------------------------------------------------------------------------------------------------------------------|-------------------------------------------------------------|--------------------------------------------------------------------|--------------------------------------------------------------------------------------------------------|
| Rabinowitz et al, 2011 <sup>65</sup>  | Retrospective cohort study with control group; 2,394 physicians | 97 graduates of the Jefferson Medical College Physician Shortage Area Program (PSAP) and 2,004 JMC peers from the classes of 1992-2002                                                  | Completion of PSAP vs not in PSAP                           | Rural family medicine practice                                     | 32.0% vs 3.2%<br>RR 9.9 (6.8-14.4), <i>P</i> < .001                                                    |
| Quinn et. al, 2011 <sup>66</sup>      | Retrospective cohort study with control group; 554 physicians   | 48 graduates of University of Missouri Rural Track Pipeline Programs (RTPP ) and 506 non-RTPP graduates                                                                                 | RTPP participation                                          | Rural location for first practice location                         | 57% of RTPP<br>[no comparison group]                                                                   |
| Rabinowitz et al, 2012 <sup>67</sup>  | Retrospective cohort study with control group; 8,231 physicians | 1,757 graduates of 3 medical school rural programs who were practicing in the state in which they trained, and 6,474 IMGs graduating in the same year and practicing in the same states | Graduation from U.S. rural training program vs IMG training | Rural family medicine practice<br>Any rural primary care specialty | RR 10.0 (8.7-11.6),<br><i>P</i> < .001<br>RR 3.8 (3.5-4.2), <i>P</i> < .001                            |
| Rabinowitz, et al, 2012 <sup>68</sup> | Retrospective cohort study with control group; 3,006 physicians | Graduates of Jefferson Medical College from 1978–2002 who reported a planned specialty at matriculation and were assessed for rural practice location in 2007                           | Planned family medicine specialty at matriculation          | Rural practice                                                     | 29.4% were practicing in rural areas<br>1.5-2.1 times as likely to practice rural as other specialties |
| Crump et al, 2013 <sup>69</sup>       | Retrospective cohort study with control group; 1,391 physicians | 60 graduates of the rural-based Trover Campus (ULTC) and non-ULTC graduates of the University of Louisville School of Medicine                                                          | Completion of ULTC vs non-ULTC                              | Non-metropolitan practice                                          | RR 6.27 (4.26-9.24),<br><i>P</i> < .001                                                                |
| Deutchman, 2013 <sup>27</sup>         | Cross-sectional; N/A physicians                                 | 35 U.S. medical schools with rural tracks or rural tracks in development; reports on 18 programs that tracked students' practice location                                               | Completion of rural track in medical school                 | Rural practice                                                     | Average of 44% of graduates practice in rural area [range: 20% to 73%]                                 |
| MacDowell et al, 2013 <sup>70</sup>   | Retrospective cohort study with control group; 2,283 physicians | 160 graduates of University of Illinois College Rural Medical Education Program (RMED) and 2,663 non-RMED graduates                                                                     | Completion of RMED vs non-RMED                              | Rural practice<br>CMS primary care shortage zip code               | 56.3% vs 6.9%<br>OR 17.20 (12.18-24.35),<br><i>P</i> < .05<br>OR 12.77 (8.58-18.99),<br><i>P</i> < .05 |

| Study authors, Year <sup>ref</sup>   | Design; sample size             | Participants and data source                                                                                                              | Predictor(s)                      | Outcome(s)       | Results <sup>a</sup>                                       |
|--------------------------------------|---------------------------------|-------------------------------------------------------------------------------------------------------------------------------------------|-----------------------------------|------------------|------------------------------------------------------------|
| Wendling et al, 2016 <sup>71,b</sup> | Cross-sectional; 179 physicians | 179 graduates of the Rural Physician Program (RPP) in Michigan (1978-2006) compared to 2792 graduates of other Michigan clinical campuses | Graduating from RPP vs not in RPP | Practice in HPSA | 63% vs 49%, $P < .001$                                     |
|                                      |                                 |                                                                                                                                           |                                   | Rural practice   | 45% vs 14%, $P < .001$<br>AOR 3.09 (2.12-4.50), $P < .001$ |
|                                      |                                 |                                                                                                                                           | Rural origin                      |                  | AOR 2.80 (2.09-3.74), $P < .001$                           |
|                                      |                                 |                                                                                                                                           | Primary care specialty            |                  | AOR 1.65 (1.31-2.08), $P < .001$                           |
|                                      |                                 |                                                                                                                                           | Gender (male)                     |                  | AOR 1.39 (1.10-1.75), $P = .006$                           |

Abbreviations: NHSC indicates National Health Service Corps; HPSA, federally designated primary care Health Professional Shortage Area; NA = not available; ns, not significant; AOR, adjusted odds ratio; OR, odds ratio; RR, risk ratio; IMG, international medical graduate; CMS, Centers for Medicare and Medicaid Services.

<sup>a</sup>95% confidence intervals are provided in parentheses.

<sup>b</sup>This study was published online ahead of print in August 2015.

### E. Studies That Examined GME Programs as Predictors of Primary Care Physician Practice in Underserved Urban or Rural Areas (n = 20)

| Study author, year <sup>ref</sup>   | Design; sample size              | Participants data source                                                                           | Predictor(s)                                                                           | Outcome(s)                                                                        | Results <sup>a</sup>                                                                                   |
|-------------------------------------|----------------------------------|----------------------------------------------------------------------------------------------------|----------------------------------------------------------------------------------------|-----------------------------------------------------------------------------------|--------------------------------------------------------------------------------------------------------|
| Denton et al 1989 <sup>72</sup>     | Cross-sectional; 689 physicians  | Graduates of Texas family medicine residency programs (1979–1987)                                  | Graduate of a Texas family medicine program                                            | Rural practice                                                                    | 24.2% in city of < 10,000 people [no comparison group]<br><br>19.7% in city of 10,000 to 24,999 people |
| Baldwin et al, 1995 <sup>73</sup>   | Cross-sectional; 503 physicians  | Survey of graduates from University of Washington Family Medicine Residency Network from 1973–1990 | Completion of University of Washington Family Medicine Residency                       | Rural practice<br>Rural vs urban private practice<br>Rural vs urban solo practice | 30% of graduates [no comparison group]<br>86% vs 64%<br>24% vs 9%                                      |
| West et al, 1996 <sup>74</sup>      | Case series; 358 physicians      | Survey of University of Washington Family Practice Residency Network                               | Completion of University of Washington Family Medicine Residency                       | Rural practice<br>Urban practice<br>Mixed rural and urban rural                   | 22.3% (n = 80) [no comparison group]<br>56.8% (n = 203)<br>20.9% (n = 75)                              |
| Frisch et al, 2003 <sup>75</sup>    | Case series; 593 physicians      | Graduates of 3 Kansas family medicine residency programs, survey had 87% response rate             | Completion of family medicine residency program                                        | Rural practice                                                                    | 32% [no comparison group]                                                                              |
| Tavernier et al, 2003 <sup>76</sup> | Cross-sectional; 775 physicians  | Survey of 450 US family medicine residency programs on indicators associated with MUA exposure     | Early MUA exposures combined with medical training experiences in underserved settings | Born/raised in MUA<br>Service experience in medical training                      | 57% vs. 35%, $P < .0001$ , OR: 2.4, CI: 1.8-3.4<br>75% vs. 62%, $P = .0005$ , OR: 1.9, CI: 1.3-2.6     |
| Pacheco et al, 2005 <sup>77</sup>   | Cross-sectional ; 317 physicians | Graduates 1974–2004 of New Mexico family medicine training programs                                | Trained in rural residency program vs urban<br>Minority vs non-minority                | Rural practice location<br>Rural practice location                                | 65.1% vs 25.8%, $P < .001$ [unadjusted]<br>35.4 vs 27.6%, $P = .004$ [unadjusted]                      |

| Study author, year <sup>ref</sup>  | Design; sample size               | Participants data source                                                                                                                                        | Predictor(s)                                                        | Outcome(s)                                                    | Results <sup>a</sup>                           |
|------------------------------------|-----------------------------------|-----------------------------------------------------------------------------------------------------------------------------------------------------------------|---------------------------------------------------------------------|---------------------------------------------------------------|------------------------------------------------|
| Edwards et al, 2006 <sup>78</sup>  | Case series; 346 physicians       | Survey of graduates from East Tennessee State University from 1978–2002                                                                                         | Completion of family residency program                              | Rural practice:                                               |                                                |
|                                    |                                   |                                                                                                                                                                 |                                                                     | MUA only                                                      | 28% [no comparison group]                      |
|                                    |                                   |                                                                                                                                                                 |                                                                     | HPSA only                                                     | 2.4%                                           |
|                                    |                                   |                                                                                                                                                                 |                                                                     | Both MUA and HPSA                                             | 62%                                            |
| Florence et al, 2007 <sup>79</sup> | Cross-sectional; 130 physicians   | Graduates of the East Tennessee State University Community Partnerships Program (CPP) and controls from the traditional program who matriculated from 1992–2002 | Completion of CPP program vs non CPP participation                  | Rural practice                                                | 46% vs 28%, $P < .05$ [unadjusted]             |
| Morris et al, 2008 <sup>80</sup>   | Cross-sectional; 838 physicians   | Survey of graduates from the Washington, Alaska, Montana, and Idaho (WAMI) Family Medicine Residency Network from 1986-2002                                     | CHC vs non-CHC trained family physicians                            | Underserved settings                                          | 63.9% vs 37.3%, $P < .001$ , OR: 2.7 (1.6,4.7) |
|                                    |                                   |                                                                                                                                                                 |                                                                     | Rural Health Clinic                                           | 18.1% vs 6.4%, $P < .001$ , OR: 2.4 (1.2, 5)   |
| Reese et al, 2008 <sup>81</sup>    | Cross-sectional; 1,545 physicians | Graduates of 22 Family Medicine residencies that closed between 2000-2006                                                                                       | Completion of respective Family Medicine Program                    | Rural practice<br>Full or partial county primary care<br>HPSA | 21%<br>68%                                     |
| Cashman et al, 2009 <sup>82</sup>  | Case series; 347 physicians       | Survey of graduates from University of Massachusetts Family Medicine Residency from 1976-1985, 1986-1995, 1996-2005                                             | Completion of University of Massachusetts Family Medicine Residency | Current Practice<br>HPSA:                                     | [no comparison group]                          |
|                                    |                                   |                                                                                                                                                                 |                                                                     | 1976–1985                                                     | 9.7%, $P < .01$                                |
|                                    |                                   |                                                                                                                                                                 |                                                                     | 1986–1995                                                     | 15%, $P < .001$                                |
|                                    |                                   |                                                                                                                                                                 |                                                                     | 1996–2005                                                     | 20%, $P < .001$                                |
| Ferguson et al, 2009 <sup>83</sup> | Cross-sectional; 262 physicians   | Survey of graduates from University of Massachusetts University-based family medicine residency                                                                 | Residency training site                                             | Current<br>Underserved and rural practice                     |                                                |
|                                    |                                   |                                                                                                                                                                 |                                                                     | Community Health Center                                       | 29.3%, $P < .001$ vs 26.8%, $P < .017$         |
|                                    |                                   |                                                                                                                                                                 |                                                                     | Urban center                                                  | 6.5%, $P < .001$ vs 22.6%, $P < .017$          |
|                                    |                                   |                                                                                                                                                                 |                                                                     | Rural center                                                  | 10.3%, $P < .001$ vs 41.4%, $P < .017$         |

| Study author, year <sup>ref</sup>   | Design; sample size                                           | Participants data source                                                                                                              | Predictor(s)                                                        | Outcome(s)                             | Results <sup>a</sup>                                                                                              |
|-------------------------------------|---------------------------------------------------------------|---------------------------------------------------------------------------------------------------------------------------------------|---------------------------------------------------------------------|----------------------------------------|-------------------------------------------------------------------------------------------------------------------|
| Chen et al, 2010 <sup>84</sup>      | Cross-sectional; 175,649 physicians                           | Clinically active allopathic and osteopathic national physician cohort                                                                | Trained in rural residency program vs no rural program              | Rural practice                         | RR = 3.4. $P < .001$                                                                                              |
|                                     |                                                               |                                                                                                                                       | Trained in rural family medicine residency vs no rural program      |                                        | 60% in rural practice<br>RR 2.8, $P < .001$                                                                       |
| Fordyce et al, 2012 <sup>85</sup>   | Cross-sectional; 201,213 physicians                           | 2005 AMA Physician Masterfile and AOA Masterfile of USMD, DO and IMG primary care physicians (PCPs)                                   | DO, USMD, or IMG training                                           | Rural PCP workforce DO vs Non-DO       | 20.5% vs 14.9%                                                                                                    |
|                                     |                                                               |                                                                                                                                       |                                                                     | Rural PCP workforce IMG vs Non-IMG     | 12.4% vs 9.1%                                                                                                     |
|                                     |                                                               |                                                                                                                                       |                                                                     | Rural PCP workforce DO (total)         | 10.4% (n = 15,644)                                                                                                |
|                                     |                                                               |                                                                                                                                       |                                                                     | Rural PCP workforce IMG (total)        | 19.3% (n = 51,502)                                                                                                |
| Hixon et al, 2012 <sup>86</sup>     | Case series; 86 physicians                                    | Graduates of University of Hawaii Family Medicine and Community Health graduates from 1993 to 2010                                    | Completion of Hawaii Family Medicine Residency Program              | Remain in Hawaii                       | 73% [no comparison group]                                                                                         |
|                                     |                                                               |                                                                                                                                       |                                                                     | HPSA practice throughout United States | 36%                                                                                                               |
| Patterson et al, 2013 <sup>26</sup> | Cross-sectional; 123 physicians                               | 18 family medicine residencies with rural training tracks active 2008–2012; 18/25 programs reponed; 33 physicians with follow-up date | Completion of a family medicine residency with rural training track | Rural practice                         | 71.9% [2-3x the proportion of family medicine residency graduates overall]<br><br>3 years after graduation: 60.6% |
| Petrany et al, 2013 <sup>87</sup>   | Retrospective cohort study with control group; 106 physicians | 12 graduates of the Marshall University Family Medicine Residency Rural Track and 94 graduates of the traditional track               | Completion of the MUFMR rural track vs traditional track            | Rural practice location                | 83% vs 40%, $P < .01$                                                                                             |



| Study author, year <sup>ref</sup>  | Design; sample size               | Participants data source                                                                                                                                                                                           | Predictor(s)                                                               | Outcome(s)                                          | Results <sup>a</sup>                                                                                                                                                                           |
|------------------------------------|-----------------------------------|--------------------------------------------------------------------------------------------------------------------------------------------------------------------------------------------------------------------|----------------------------------------------------------------------------|-----------------------------------------------------|------------------------------------------------------------------------------------------------------------------------------------------------------------------------------------------------|
| Phillips et al, 2013 <sup>88</sup> | Cross-sectional; 3,430 physicians | Residents in 828 rural health clinics (RHCs), federally qualified health centers (FQHCs), and critical access hospitals (CAHs) under whom a Medicare Part B claim was filed between 2001–2005, re-measured in 2009 | Training in a RHC, FQHC, or CAH vs other types of sites                    | Practice in safety-net setting (RHC, FQHC, CAH)     | 52.6% of residents who had trained in a CAH, 38.1% who had trained in an RHC, and 31.2% who had trained in an FQHC between 2001–2005 were currently practicing in a safety net setting in 2009 |
| Ross et al, 2013 <sup>89</sup>     | Cross-sectional; 62 physicians    | Survey of graduates from Cascades East Family Medicine Residency (CEFMR) from 1994–2009                                                                                                                            | Completion of family medicine programs located in small community hospital | Practice in population < 25,000<br>Practice in HPSA | 60% of graduates [no comparison group]<br>63% of graduates                                                                                                                                     |
| Crane et al, 2014 <sup>90</sup>    | Cross-sectional; 37 physicians    | Survey of graduates of North Carolina Hendersonville Family Medicine Residency Program from 1999–2010                                                                                                              | Completion of rural track training program                                 | Rural practice<br>Practice in full or partial HPSAs | 65% of graduates [no comparison group]<br>60% of graduates                                                                                                                                     |

Abbreviations: GME indicates graduate medical education; HPSA, federally designated primary care Health Professional Shortage Area; MUA, Medically Underserved Area; IMG, international medical graduate; AMA, American Medical Association; AOA, American Osteopathic Association; OR, odds ratio; RR, risk ratio.

<sup>a</sup>95% confidence intervals are provided in parentheses.
